# Supplementary material for: Bioadhesive 3D-Printed Skin Drug Delivery Polymeric Films: From the Drug Loading in Mesoporous Silica to the Manufacturing Process
Source: MDPI journal article supplement (doi:10.3390/pharmaceutics15010020), 2022-12-21
Supplement: s1 [file s1]

## Supplementary material for

### Bioadhesive 3D printed skin drug delivery polymeric films: from the drug loading in mesoporous silica to the manufacturing process

Rafaela Santos de Oliveira<sup>1,4a</sup>, Nadine Lysyk Funk<sup>1,4a</sup>, Juliana dos Santos<sup>1,4</sup>, Thayse Viana de Oliveira<sup>1,4</sup>, Edilene Gadelha de Oliveira<sup>1</sup>, Cesar Liberato Petzhold<sup>2</sup>, Tania Maria Haas Costa<sup>2</sup>, Edilson Valmir Benvenuti<sup>2</sup>, Monique Deon<sup>3,4</sup>, Ruy Carlos Ruver Beck<sup>1,4\*</sup>

<sup>1</sup> Programa de Pós-Graduação em Ciências Farmacêuticas, Faculdade de Farmácia, Universidade Federal do Rio Grande do Sul, Porto Alegre 90610-900, Brazil; rafaelasantosooliveira@gmail.com (R.S.O.); nadine.lysyk@ufrgs.br (N.L.F.); santos.juliana@ufrgs.br (J.d.S.); thaysevfarma@gmail.com (T.V.d.O.); edileneego@yahoo.com.br (E.G.d.O.)

<sup>2</sup> Instituto de Química, Universidade Federal do Rio Grande do Sul, Porto Alegre 90650-001, Brazil; petzhold@iq.ufrgs.br (C.L.P.); taniaha@iq.ufrgs.br; benvenuti@ufrgs.br (E.V.B.)

<sup>3</sup> Departamento de Farmacociências, Universidade Federal de Ciências da Saúde de Porto Alegre, Porto Alegre 90050-170, Brazil; monique.deon@ufcspa.edu.br (M.D)

<sup>4</sup> Laboratório de Nanocarreadores e Impressão 3D em Tecnologia Farmacêutica (Nano3D), Faculdade de Farmácia, Universidade Federal do Rio Grande do Sul, Porto Alegre 90610-000, Brazil; ruy.beck@ufrgs.br

<sup>a</sup> These authors contributed equally

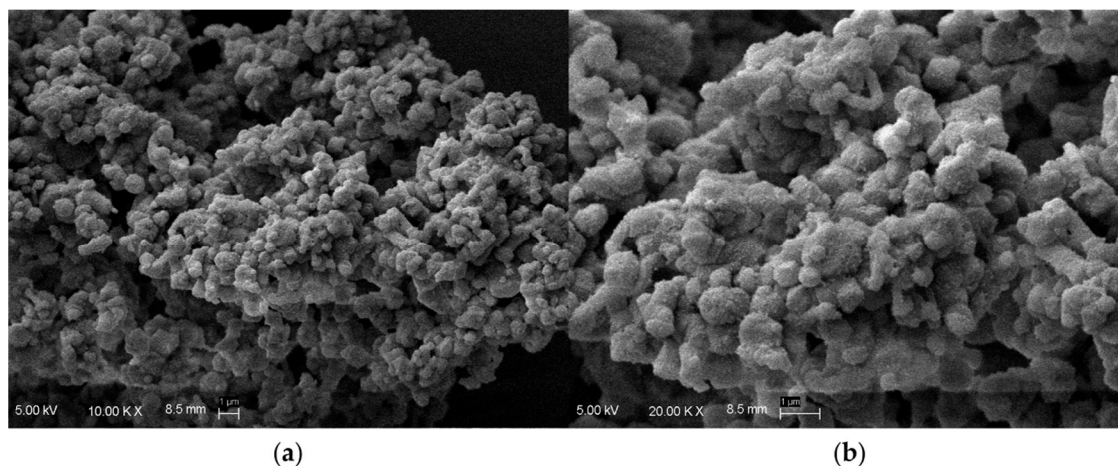

**S1.** Scanning electron microscopy (SEM) image of bare MSN (MCM-41) at different magnifications: **(a)** 10,000x and **(b)** 20,000x.

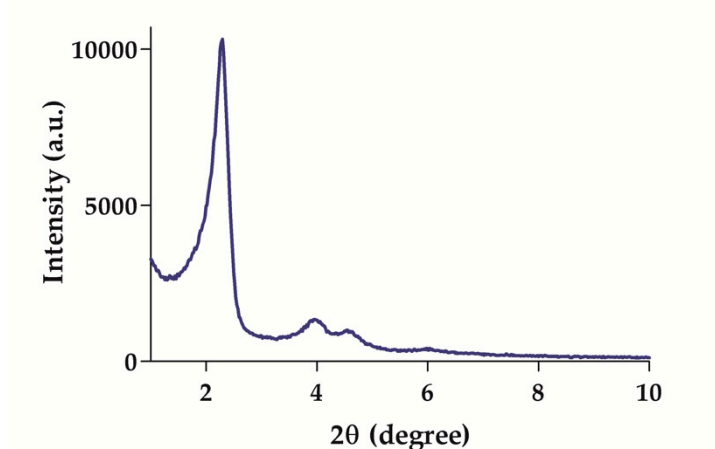

**S2.** X-ray Powder Diffraction (XRD) analysis of MSN in the range of  $2\theta = 1$  to  $10^\circ$ .
